# Supplementary material
Source: publisher figshare collection journal article supplement (https://frontiersin.figshare.com/ndownloader/files/23896673)
Supplement: Supplementary file [file 23896673]

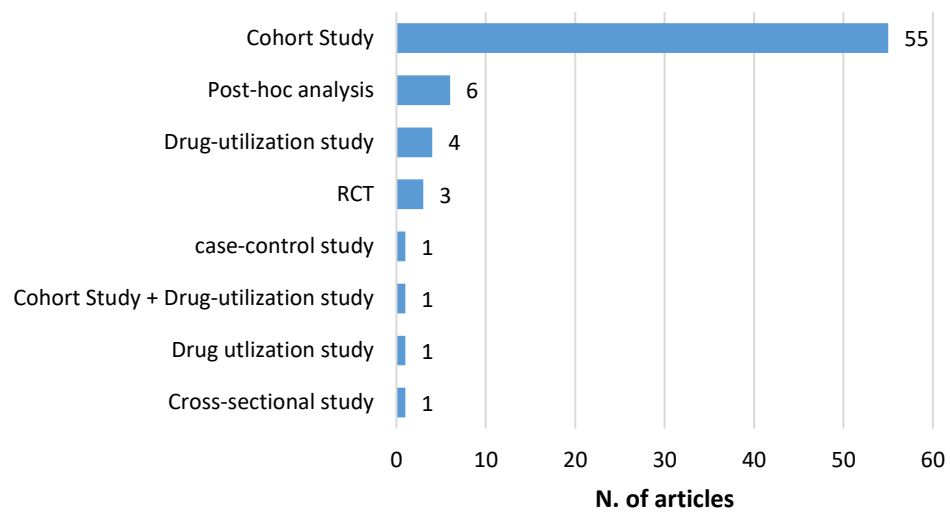

**Supplementary Figure 1.** Artificial intelligence techniques stratified by study design.
